# Supplementary material for: Synthesis, crystal structure, and luminescence properties of a three-dimensional coordination polymer from europium(iii) carbonate hemioxalate hydrate
Source: Royal Society of Chemistry journal article supplement (doi:10.1039/d2ce01105k), 2022-01-01
Supplement: d2ce01105k1.pdf [file d2ce01105k1.pdf]

## Supplementary Materials for

### Synthesis, Crystal Structure, and Luminescent Property of a Three-Dimensional Coordination Polymer from Europium(III) Carbonate Hemioxalate Hydrate

Rina Takano <sup>a</sup>, Takayuki Ishida <sup>a,\*</sup>, Burak Ay <sup>b,\*</sup>

<sup>a</sup>*Department of Engineering Science, The University of Electro-Communications, Chofu, Tokyo 182-8585, Japan*

<sup>b</sup>*Department of Chemistry, Arts and Science Faculty, Çukurova University, 01330, Adana, Turkey*

Phone: +90 322 338 60 84/2481, Fax: +90 322 338 60 70

*bay@cu.edu.tr*

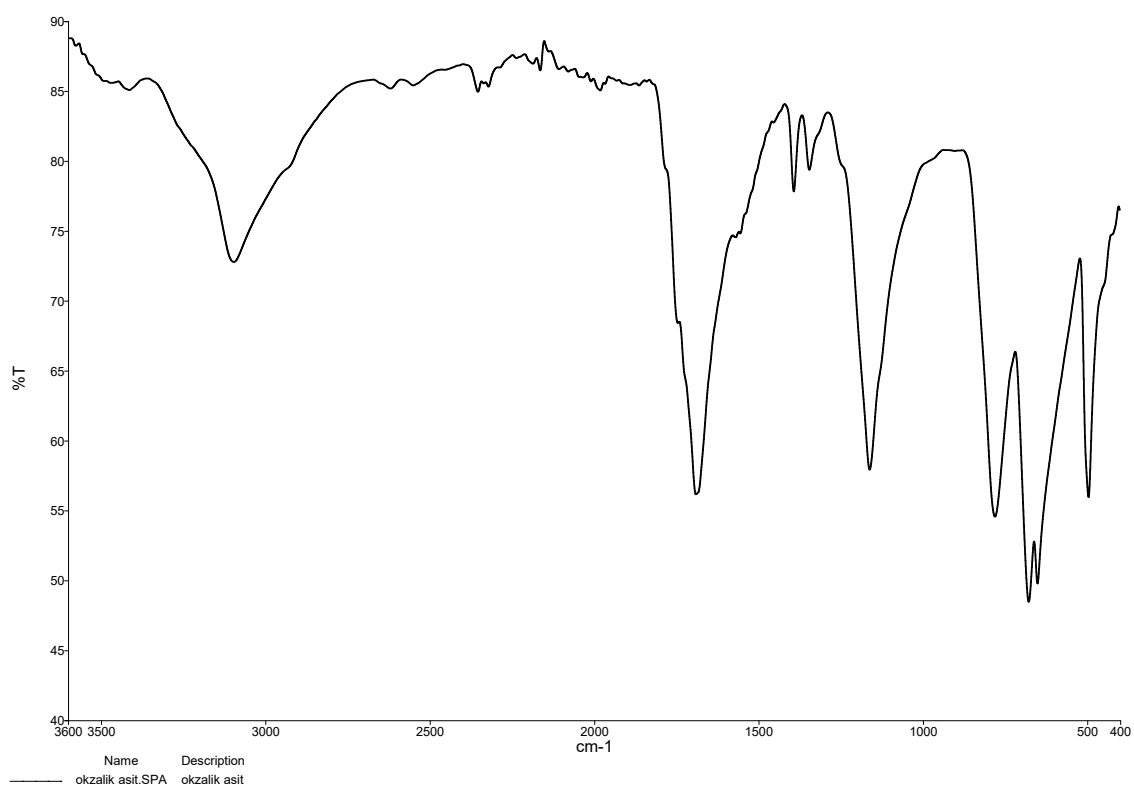

**Figure S1.** FT-IR spectrum of oxalic acid.

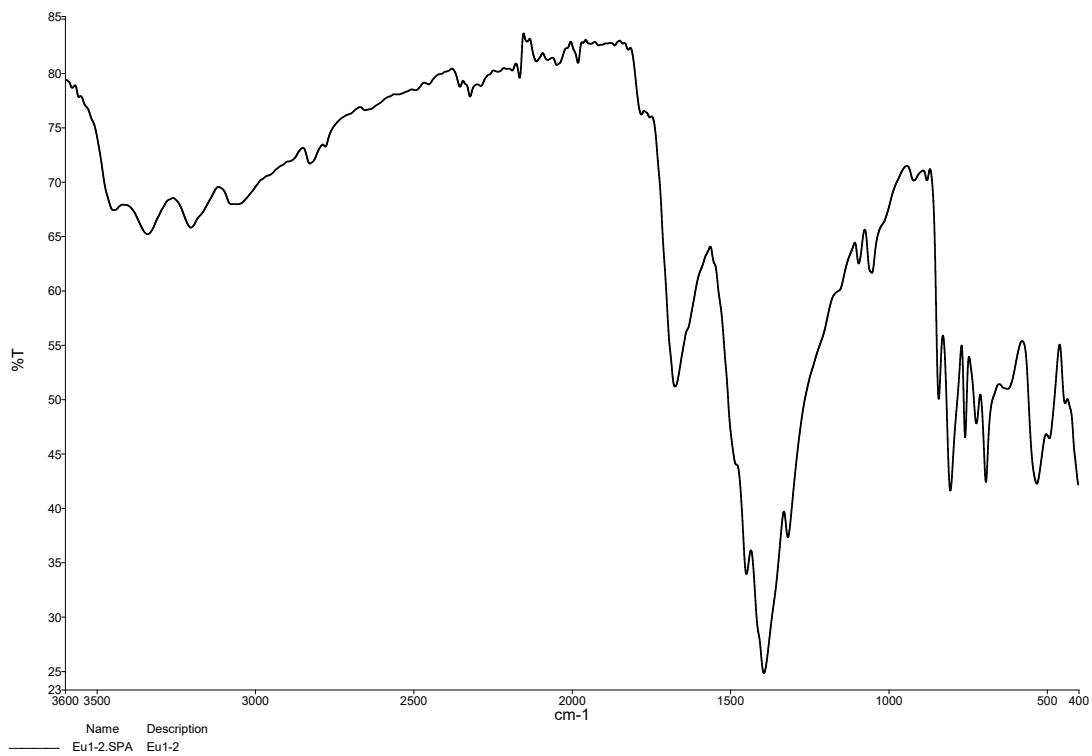

**Figure S2.** FT-IR spectrum of **1**.

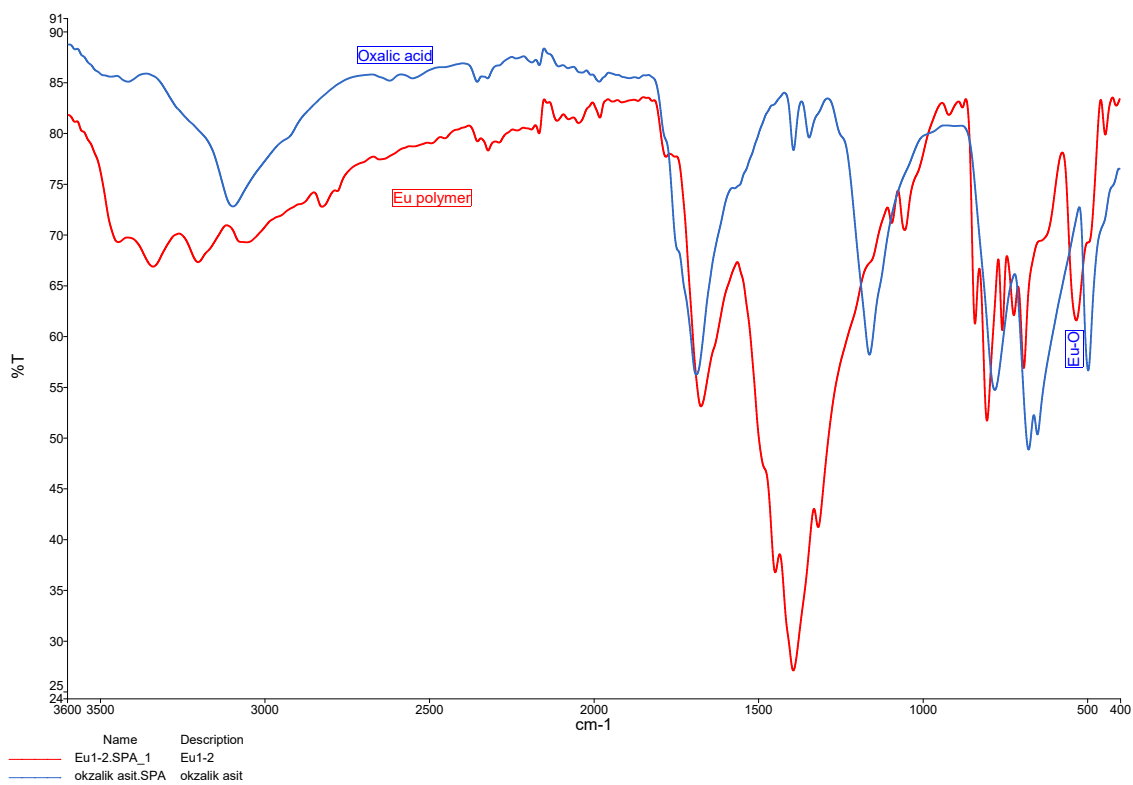

**Figure S3.** Overlapping FT-IR spectra of oxalic acid and **1**.

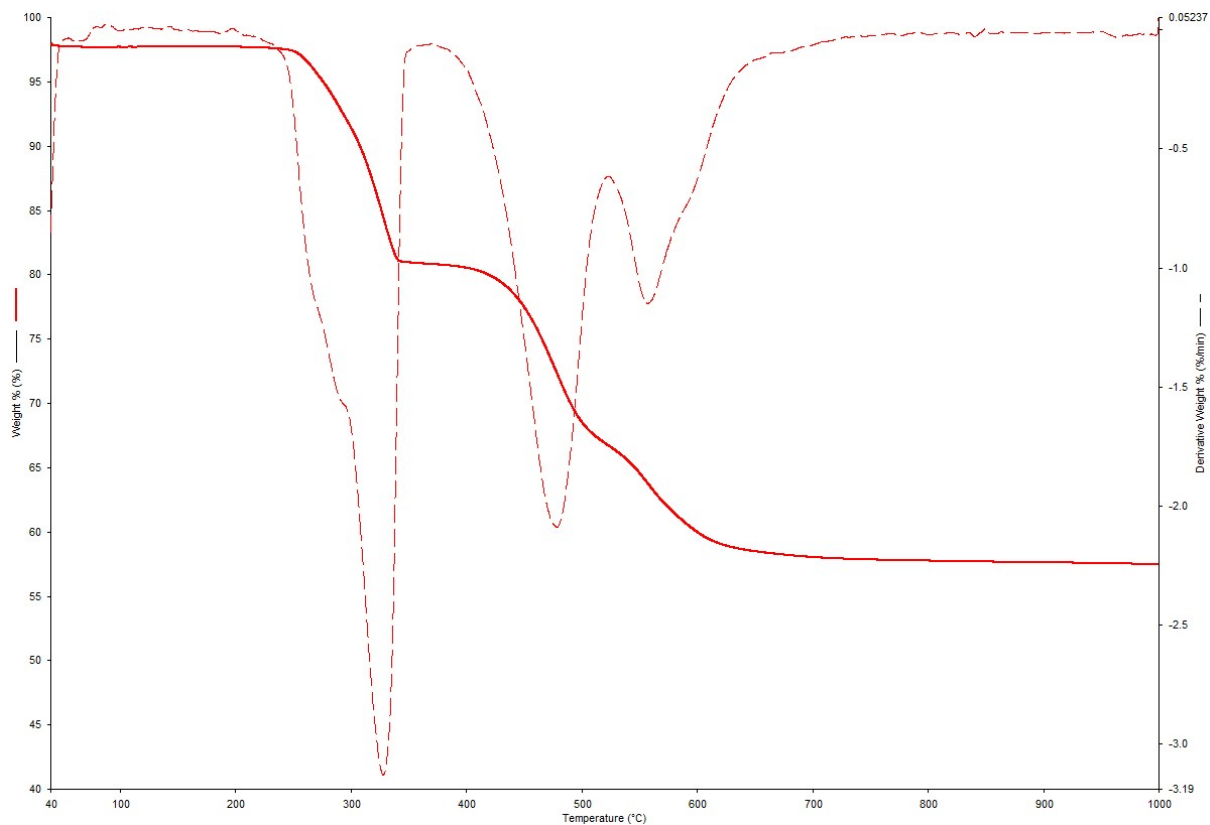

**Figure S4.** TG/DTG curves of **1**.

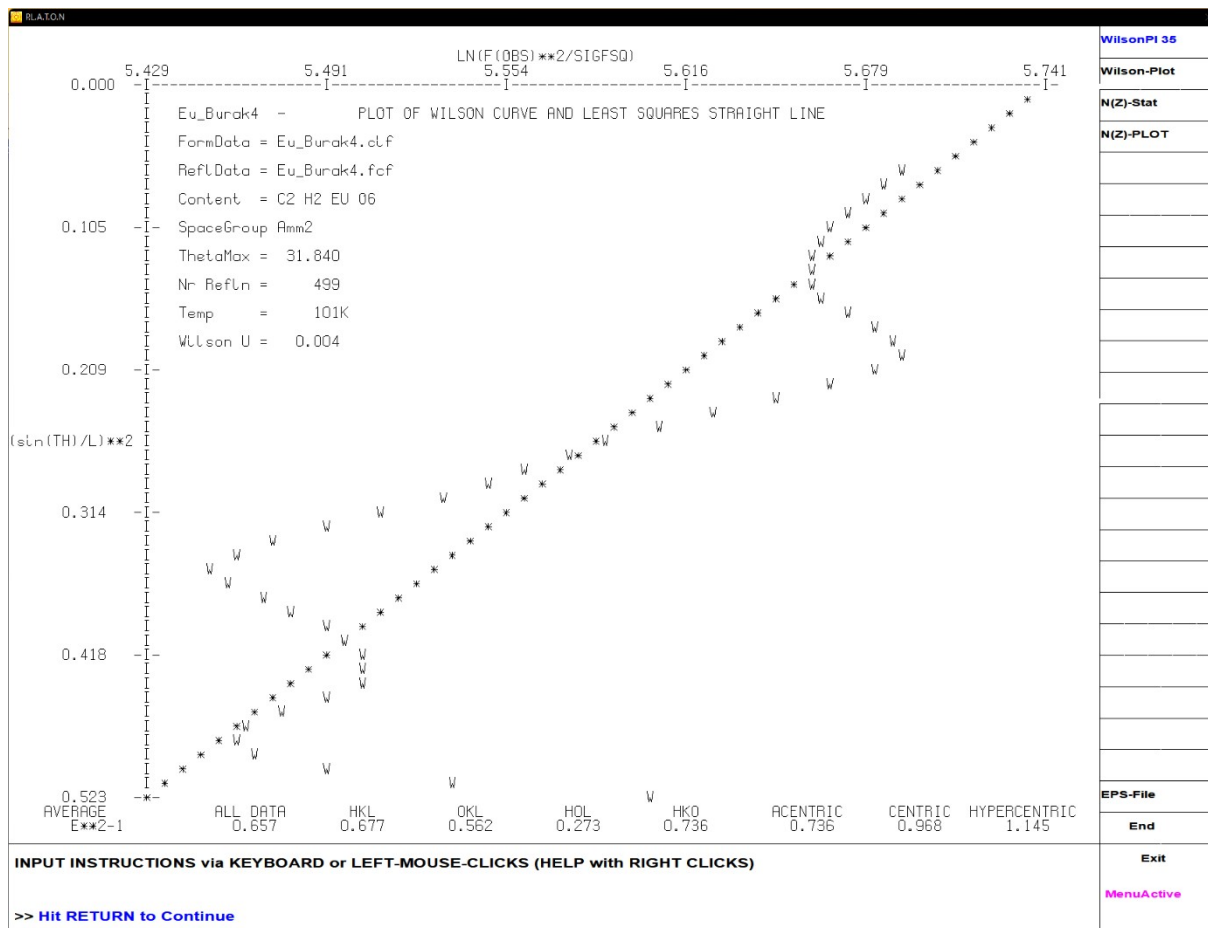

Figure S5. Wilson plot of 1, drawn in the PLATON program.<sup>S1</sup>

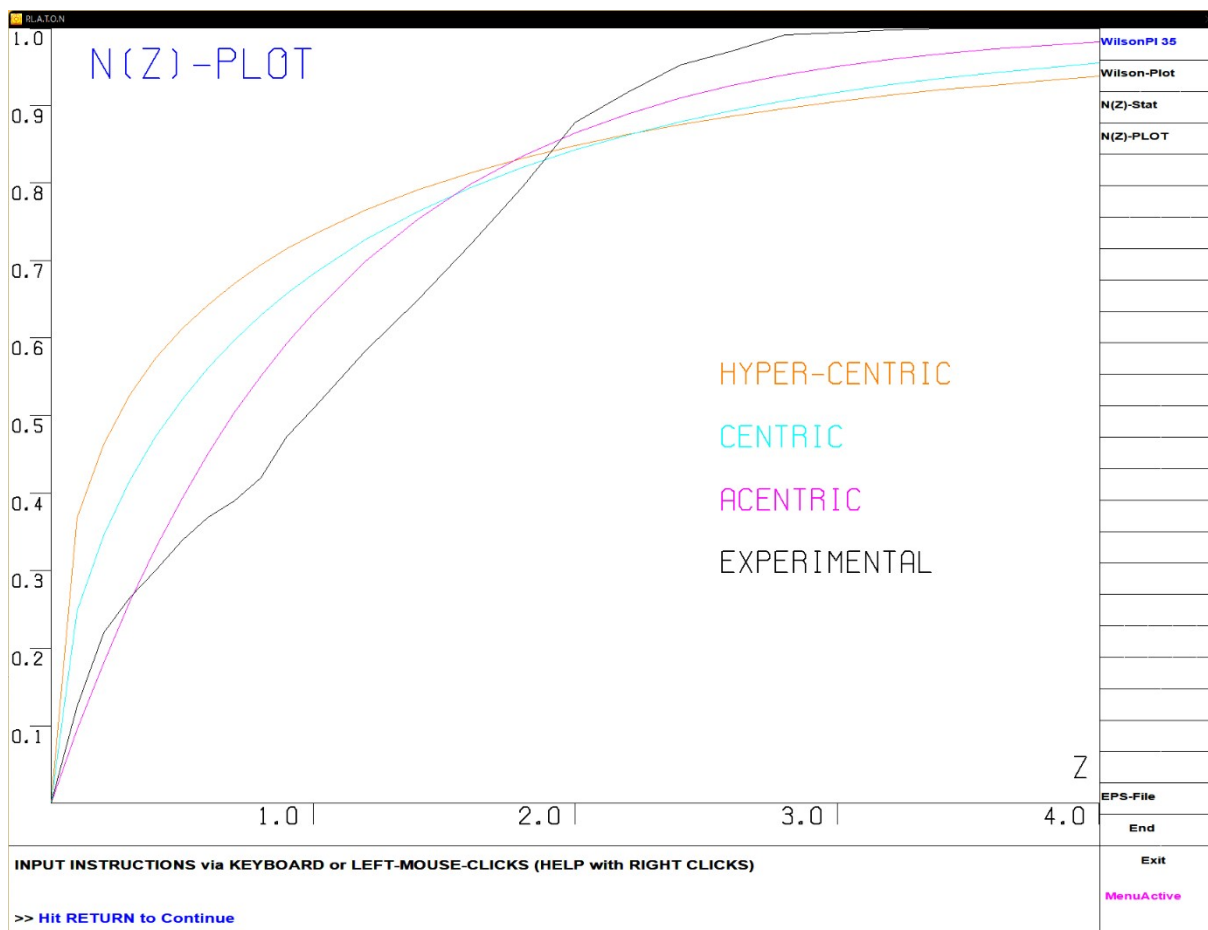

Figure S6.  $N(z)$  plot of **1**, drawn in the PLATON program.<sup>S1</sup>

## Reference

S1. A. L. Spek, *Acta Cryst. D*, 2009, **65**, 148-155.
